# Supplementary material for: Untargeted Lipidomics Analysis of the Cyanobacterium Synechocystis sp. PCC 6803: Lipid Composition Variation in Response to Alternative Cultivation Setups and to Gene Deletion
Source: PubMed Central journal article supplement (PMC7727718; doi:10.3390/ijms21238883), 2020-11-24
Supplement: ijms-21-08883-s001.pdf [file ijms-21-08883-s001.pdf]

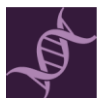

Supplementary Materials

# Untargeted Lipidomics Analysis of the Cyanobacterium *Synechocystis* sp. PCC 6803: Lipid Composition Variation in Response to Alternative Cultivation Setups and to Gene Deletion

Weronika Hewelt-Belka <sup>1</sup>, Ágata Kot-Wasik <sup>1</sup>, Paula Tamagnini <sup>2,3,4</sup> and Paulo Oliveira <sup>2,3,\*</sup>

<sup>1</sup> Department of Analytical Chemistry, Faculty of Chemistry, Gdańsk University of Technology, Gabriela Narutowicza 11/12, 80-233 Gdańsk, Poland; werbelka@pg.edu.pl (W.H.-B.); agawasik@pg.edu.pl (Á.K.-W.)

<sup>2</sup> i3S—Instituto de Investigação e Inovação em Saúde, Universidade do Porto, R. Alfredo Allen 208, 4200-135 Porto, Portugal; pmtamagn@ibmc.up.pt

<sup>3</sup> IBMC—Instituto de Biologia Molecular e Celular, Universidade do Porto, R. Alfredo Allen 208, 4200-135 Porto, Portugal

<sup>4</sup> Departamento de Biologia, Faculdade de Ciências, Universidade do Porto, R. Campo Alegre s/n, 4169-007 Porto, Portugal

\* Correspondence: paulo.oliveira@ibmc.up.pt; Tel.: +351-22-607-4900

Received: 30 October 2020; Accepted: 21 November 2020; Published: date

Contents list

**Table S1.** List of identified lipid compounds in *Synechocystis* sp. PCC 6803.

**Table S2.** Relative amount of lipid species within the classes MGDG, DGDG, and SQDG detected in *Synechocystis* sp. PCC 6803 wild-type and *tolC*-mutant strain cells cultivated photoautotrophically either in FGM or in SGM.

**Table S3.** Comparison of abundance of specific lipid species detected in cells of *Synechocystis* sp. PCC 60803 cultivated in FGM and in SGM.

**Table S4.** Comparison of abundance of specific lipid species detected in cells of *Synechocystis* sp. PCC 60803 *tolC*-mutant strain cultivated in FGM and in SGM.

**Table S5.** Comparison of lipid composition between *TolC* and WT in FGM and SGM.

**Figure S1.** Analytical workflow used for the lipidomic analysis of *Synechocystis* sp. PCC 6803 cells.

**Figure S2.** Representative ion chromatogram of the most abundant lipid species of *Synechocystis* sp. PCC 6803 wild-type.

**Figure S3.** Total lipid content among the MGDG, DGDG and SQDG classes of the *Synechocystis* sp. PCC 6803 wild-type strain.

**Figure S4.** Total lipid content among the MGDG, DGDG and SQDG classes of the *Synechocystis* sp. PCC 6803 *tolC*-mutant strain.

**Table S1.** List of identified lipid compounds in *Synechocystis* sp. PCC 6803. When possible, fatty acyl composition was evaluated by the MS/MS experiments.

| Lipid name | Fatty acyl composition | Formula       | Neutral Mass | Retention Time [min] |
|------------|------------------------|---------------|--------------|----------------------|
| DGDG 32:0  | 16:0-16:0              | C47 H88 O15   | 892.6135     | 10.6                 |
| DGDG 32:1  | 16:0-16:1              | C47 H86 O15   | 890.5976     | 9.8                  |
| DGDG 32:2  |                        | C47 H84 O15   | 888.5813     | 9.2                  |
| DGDG 33:2  |                        | C48 H86 O15   | 902.5971     | 9.7                  |
| DGDG 33:3  |                        | C48 H84 O15   | 900.5813     | 9.1                  |
| DGDG 34:1  | 16:0-18:1              | C49 H90 O15   | 918.6283     | 10.9                 |
| DGDG 34:2  | 16:0-18:2              | C49 H88 O15   | 916.6130     | 10.2                 |
| DGDG 34:3  | 16:0-18:3              | C49 H86 O15   | 914.5983     | 9.6                  |
| DGDG 34:4  | 16:1-18:3              | C49 H84 O15   | 912.5817     | 8.9                  |
| DGDG 36:3  |                        | C51 H90 O15   | 942.6283     | 10.6                 |
| MGDG 30:1  |                        | C39 H72 O10   | 700.5107     | 9.8                  |
| MGDG 32:0  | 16:0-16:0              | C41 H78 O10   | 730.5603     | 11.8                 |
| MGDG 32:1  | 16:0-16:1              | C41 H76 O10   | 728.5447     | 10.9                 |
| MGDG 32:2  | 16:0-16:2              | C41 H74 O10   | 726.5310     | 10.2                 |
| MGDG 32:3  | 18:3-14:0              | C41 H72 O10   | 724.5128     | 9.5                  |
| MGDG 33:1  | 16:0-17:3              | C42 H78 O10   | 742.5606     | 11.5                 |
| MGDG 33:2  |                        | C42 H76 O10   | 740.5442     | 10.7                 |
| MGDG 33:3  |                        | C42 H74 O10   | 738.5289     | 10.1                 |
| MGDG 34:1  | 16:0-18:1              | C43 H80 O10   | 756.5759     | 12.0                 |
| MGDG 34:2  | 16:0-18:2              | C43 H78 O10   | 754.5607     | 11.3                 |
| MGDG 34:3  | 16:0-18:3              | C43 H76 O10   | 752.5464     | 10.7                 |
| MGDG 34:4  | 16:1-18:3              | C43 H74 O10   | 750.5297     | 10.0                 |
| MGDG 36:3  | 16:0-20:3              | C45 H80 O10   | 780.5757     | 11.7                 |
| MGDG 36:4  |                        | C45 H78 O10   | 778.5600     | 11.0                 |
| MGMG 16:0  |                        | C25 H48 O9    | 492.3299     | 3.1                  |
| MGMG 16:1  |                        | C25 H46 O9    | 490.3145     | 2.2                  |
| MGMG 18:3  |                        | C27 H46 O9    | 514.3139     | 2.1                  |
| MGMG18:2   |                        | C27 H48 O9    | 516.3301     | 2.7                  |
| PG 34:1    |                        | C40 H77 O10 P | 748.5248     | 8.8                  |
| PG 34:2    | 16:0-18:2              | C40 H75 O10 P | 746.5117     | 8.1                  |
| PG 34:3    | 16:0-18:3              | C40 H73 O10 P | 744.4946     | 7.5                  |
| SQDG 32:0  | 16:0-16:0              | C41 H78 O12 S | 794.5225     | 7.8                  |
| SQDG 32:1  | 16:1-16:0              | C41 H76 O12 S | 792.5068     | 7.1                  |
| SQDG 33:0  |                        | C42 H80 O12 S | 808.5382     | 8.3                  |
| SQDG 33:1  |                        | C42 H78 O12 S | 806.5225     | 7.6                  |
| SQDG 34:0  |                        | C43 H82 O12 S | 822.5536     | 8.8                  |

---

|           |           |               |          |     |
|-----------|-----------|---------------|----------|-----|
| SQDG 34:1 | 16:0-18:1 | C43 H80 O12 S | 820.5379 | 8.1 |
| SQDG 34:2 | 16:0-18:2 | C43 H78 O12 S | 818.5228 | 7.5 |
| SQDG 34:3 | 16:0-18:3 | C43 H76 O12 S | 816.5069 | 7.0 |

---

**Table S2.** Relative amount of lipid species (presented as average percentage) within the classes MGDG (monogalactosyldiacylglycerols), DGDG (digalactosyldiacylglycerols), and SQDG (sulfoquinovosyldiacylglycerol) detected in *Synechocystis* sp. PCC 6803 wild-type and *tolC*-mutant strain cells cultivated photoautotrophically either in fast-growth mode (FGM) or in slow-growth mode (SGM). For each lipid class, percentages were calculated based on the average peak area of each lipid species, and on the average peak area of the total lipid species within that lipid class.

|             | Wild-type                                          |                              |                                                    |                              | <i>tolC</i> -mutant                                |                              |                                                    |                              |
|-------------|----------------------------------------------------|------------------------------|----------------------------------------------------|------------------------------|----------------------------------------------------|------------------------------|----------------------------------------------------|------------------------------|
|             | FGM<br>average<br>%<br>relative<br>amount<br>(n=6) | FGM<br>standard<br>deviation | SGM<br>average<br>%<br>relative<br>amount<br>(n=6) | SGM<br>standard<br>deviation | FGM<br>average<br>%<br>relative<br>amount<br>(n=6) | FGM<br>standard<br>deviation | SGM<br>average<br>%<br>relative<br>amount<br>(n=6) | SGM<br>standard<br>deviation |
| <b>MGDG</b> |                                                    |                              |                                                    |                              |                                                    |                              |                                                    |                              |
| MGDG 30:1   | 0.099%                                             | 0.019%                       | 0.100%                                             | 0.019%                       | 0.159%                                             | 0.023%                       | 0.135%                                             | 0.023%                       |
| MGDG 32:0   | 4.82%                                              | 0.85%                        | 2.23%                                              | 0.42%                        | 3.74%                                              | 0.64%                        | 1.10%                                              | 0.12%                        |
| MGDG 32:1   | 6.5%                                               | 2.3%                         | 4.7%                                               | 1.6%                         | 7.5%                                               | 2.5%                         | 6.6%                                               | 1.7%                         |
| MGDG 32:2   | 1.56%                                              | 0.12%                        | 2.81%                                              | 0.38%                        | 1.64%                                              | 0.25%                        | 3.31%                                              | 0.24%                        |
| MGDG 32:3   | 0.453%                                             | 0.051%                       | 0.59%                                              | 0.17%                        | 0.437%                                             | 0.040%                       | 0.29%                                              | 0.28%                        |
| MGDG 33:1   | 0.98%                                              | 0.25%                        | 2.44%                                              | 0.36%                        | 0.96%                                              | 0.10%                        | 3.06%                                              | 0.48%                        |
| MGDG 33:2   | 0.701%                                             | 0.077%                       | 3.46%                                              | 0.18%                        | 0.64%                                              | 0.11%                        | 2.87%                                              | 0.34%                        |
| MGDG 33:3   | 1.18%                                              | 0.18%                        | 3.84%                                              | 0.30%                        | 0.92%                                              | 0.06%                        | 2.54%                                              | 0.23%                        |
| MGDG 34:1   | 7.3%                                               | 2.9%                         | 5.8%                                               | 1.2%                         | 7.2%                                               | 1.4%                         | 6.1%                                               | 2.9%                         |
| MGDG 34:2   | 22.5%                                              | 2.2%                         | 14.83%                                             | 0.47%                        | 22.9%                                              | 5.4%                         | 15.9%                                              | 2.4%                         |
| MGDG 34:3   | 49.0%                                              | 4.2%                         | 51.0%                                              | 3.7%                         | 47.2%                                              | 5.4%                         | 46.5%                                              | 1.6%                         |
| MGDG 34:4   | 4.8%                                               | 2.2%                         | 6.7%                                               | 2.8%                         | 5.9%                                               | 1.7%                         | 10.40%                                             | 0.81%                        |
| MGDG 36:3   | 0.106%                                             | 0.034%                       | 1.08%                                              | 0.30%                        | 0.544%                                             | 0.055%                       | 0.793%                                             | 0.068%                       |
| MGDG 36:4   | 0.075%                                             | 0.040%                       | 0.38%                                              | 0.11%                        | 0.218%                                             | 0.029%                       | 0.431%                                             | 0.061%                       |
| <b>SQDG</b> |                                                    |                              |                                                    |                              |                                                    |                              |                                                    |                              |
| SQDG 32:0   | 55.5%                                              | 2.1%                         | 31.7%                                              | 2.1%                         | 46.13%                                             | 0.94%                        | 21.54%                                             | 0.48%                        |
| SQDG 32:1   | 11.3%                                              | 1.4%                         | 18.8%                                              | 1.1%                         | 15.7%                                              | 2.0%                         | 24.63%                                             | 0.90%                        |
| SQDG 33:0   | 0.453%                                             | 0.083%                       | 1.50%                                              | 0.18%                        | 0.333%                                             | 0.086%                       | 1.25%                                              | 0.31%                        |
| SQDG 33:1   | 1.15%                                              | 0.16%                        | 6.17%                                              | 0.47%                        | 1.268%                                             | 0.068%                       | 6.79%                                              | 0.48%                        |
| SQDG 34:0   | 0.71%                                              | 0.52%                        | 1.06%                                              | 0.64%                        | 0.63%                                              | 0.52%                        | 1.29%                                              | 0.60%                        |
| SQDG 34:1   | 10.9%                                              | 1.0%                         | 8.98%                                              | 0.78%                        | 12.5%                                              | 1.0%                         | 11.79%                                             | 0.38%                        |
| SQDG 34:2   | 17.30%                                             | 0.64%                        | 22.25%                                             | 0.70%                        | 17.3%                                              | 1.2%                         | 22.71%                                             | 0.76%                        |
| SQDG 34:3   | 2.70%                                              | 0.25%                        | 9.59%                                              | 0.93%                        | 6.19%                                              | 0.50%                        | 9.99%                                              | 0.67%                        |
| <b>DGDG</b> |                                                    |                              |                                                    |                              |                                                    |                              |                                                    |                              |
| DGDG32:0    | 1.94%                                              | 0.24%                        | 1.94%                                              | 0.15%                        | 4.63%                                              | 0.50%                        | 2.83%                                              | 0.33%                        |

|          |        |        |        |        |        |        |       |       |
|----------|--------|--------|--------|--------|--------|--------|-------|-------|
| DGDG32:1 | 3.22%  | 0.16%  | 4.79%  | 0.11%  | 4.06%  | 0.45%  | 5.70% | 0.36% |
| DGDG32:2 | 1.041% | 0.061% | 1.96%  | 0.22%  | 1.02%  | 0.13%  | 2.00% | 0.14% |
| DGDG33:2 | 0.695% | 0.031% | 1.92%  | 0.11%  | 0.640% | 0.059% | 1.43% | 0.17% |
| DGDG33:3 | 0.940% | 0.058% | 1.65%  | 0.15%  | 0.659% | 0.057% | 1.06% | 0.07% |
| DGDG34:1 | 2.70%  | 0.26%  | 1.8%   | 0.3%   | 6.57%  | 0.48%  | 3.15% | 0.45% |
| DGDG34:2 | 14.6%  | 2.1%   | 14.6%  | 1.5%   | 20.8%  | 1.4%   | 19.3% | 1.2%  |
| DGDG34:3 | 69.3%  | 2.4%   | 65.5%  | 3.1%   | 56.6%  | 1.5%   | 57.3% | 2.2%  |
| DGDG34:4 | 5.5%   | 2.1%   | 5.5%   | 3.6%   | 4.4%   | 2.4%   | 6.7%  | 3.7%  |
| DGDG36:3 | 0.091% | 0.021% | 0.348% | 0.052% | 0.54%  | 0.16%  | 0.46% | 0.11% |

**Table S3.** The comparison of abundance of specific lipid species detected in cells of *Synechocystis* sp. PCC 60803 wild-type (WT) strain cultivated in FGM and in SGM. Fold-changes were calculated by dividing the average peak area of a given lipid species detected in samples obtained in FGM (n=6) by the average peak area of the same lipid species detected in samples obtained in SGM (n=6) (Mann-Whitney unpaired analysis,  $p < 0.05$ ).

| Lipid     | p WT FGM vs WT SGM | Fold change (FC)<br>WT FGM vs WT SGM | Log FC<br>(WT FGM vs WT SGM) |
|-----------|--------------------|--------------------------------------|------------------------------|
| MGDG 32:0 | 0.004              | 4.3                                  | 2.0                          |
| SQDG 32:0 | 0.004              | 3.7                                  | 1.7                          |
| PG 34:1   | 0.2                | 3.3                                  | 1.5                          |
| MGDG 34:2 | 0.004              | 2.8                                  | 1.5                          |
| MGDG 32:1 | 0.03               | 2.6                                  | 1.4                          |
| MGMG 18:2 | 0.006              | 3.1                                  | 1.4                          |
| MGDG 34:1 | 0.06               | 2.5                                  | 1.2                          |
| SQDG 34:1 | 0.06               | 2.4                                  | 1.2                          |
| DGDG 34:1 | 0.04               | 2.2                                  | 1.0                          |
| MGMG 16:0 | 0.1                | 2.1                                  | 0.9                          |
| MGDG 30:1 | 0.01               | 1.9                                  | 0.9                          |
| MGDG 34:3 | 0.03               | 1.8                                  | 0.9                          |
| PG 34:2   | 0.3                | 1.9                                  | 0.8                          |
| MGMG 18:3 | 0.02               | 2.0                                  | 0.8                          |
| DGDG 34:4 | 0.1                | 1.6                                  | 0.6                          |
| MGDG 32:3 | 0.08               | 1.5                                  | 0.6                          |
| SQDG 34:2 | 0.3                | 1.5                                  | 0.5                          |
| DGDG 34:3 | 0.3                | 1.5                                  | 0.5                          |
| DGDG 32:0 | 0.4                | 1.4                                  | 0.4                          |
| DGDG 34:2 | 0.5                | 1.4                                  | 0.4                          |
| MGDG 34:4 | 0.6                | 1.2                                  | 0.4                          |
| SQDG 34:0 | 1.0                | 1.0                                  | 0.4                          |
| PG 34:3   | 0.6                | 1.4                                  | 0.3                          |
| MGMG 16:1 | 0.9                | 1.3                                  | 0.2                          |
| SQDG 32:1 | 0.8                | 1.2                                  | 0.2                          |

|           |       |     |      |
|-----------|-------|-----|------|
| MGDG 32:2 | 0.6   | 1.1 | 0.1  |
| DGDG 32:1 | 0.6   | 1.0 | -0.1 |
| DGDG 33:3 | 0.3   | 0.8 | -0.4 |
| MGDG 33:1 | 0.2   | 0.8 | -0.4 |
| DGDG 32:2 | 0.2   | 0.8 | -0.5 |
| MGDG 33:3 | 0.06  | 0.6 | -0.8 |
| SQDG 33:0 | 0.06  | 0.6 | -0.8 |
| SQDG 34:3 | 0.06  | 0.6 | -0.9 |
| DGDG 33:2 | 0.04  | 0.5 | -1.0 |
| MGDG 33:2 | 0.004 | 0.4 | -1.4 |
| DGDG 36:3 | 0.01  | 0.4 | -1.5 |
| SQDG 33:1 | 0.01  | 0.3 | -1.5 |
| MGDG 36:4 | 0.04  | 0.4 | -1.6 |
| MGDG 36:3 | 0.004 | 0.2 | -2.5 |

**Table S4.** Comparison of abundance of specific lipid species detected in cells of *Synechocystis* sp. PCC 60803 *tolC*-mutant strain cultivated in FGM and in SGM. Fold-changes were calculated by dividing the average peak area of a given lipid species detected in samples obtained in FGM (n=6) by the average peak area of the same lipid species detected in samples obtained in SGM (n=6) (Mann-Whitney unpaired analysis,  $p < 0.05$ ).

| Lipid     | p tolC FGM vs tolC | Fold change (FC)     | Log FC                 |
|-----------|--------------------|----------------------|------------------------|
|           | SGM                | tolC FGM vs tolC SGM | (tolC FGM vs tolC SGM] |
| MGDG 32:0 | 0.004              | 4.8                  | 2.3                    |
| MGDG 32:3 | 0.03               | 2.3                  | 1.9                    |
| SQDG 32:0 | 0.01               | 3.0                  | 1.7                    |
| MGMG 18:2 | 0.004              | 2.7                  | 1.4                    |
| PG 34:1   | 0.06               | 2.0                  | 1.4                    |
| MGMG 18:3 | 0.004              | 2.3                  | 1.2                    |
| MGDG 34:2 | 0.04               | 2.1                  | 1.1                    |
| MGDG 34:1 | 0.01               | 1.8                  | 0.9                    |
| DGDG 34:1 | 0.04               | 1.7                  | 0.9                    |
| MGDG 30:1 | 0.02               | 1.7                  | 0.8                    |
| MGMG 16:0 | 0.06               | 1.7                  | 0.7                    |
| MGDG 32:1 | 0.1                | 1.6                  | 0.7                    |
| SQDG 34:1 | 0.08               | 1.5                  | 0.6                    |
| MGDG 34:3 | 0.04               | 1.4                  | 0.6                    |
| DGDG 32:0 | 0.2                | 1.4                  | 0.5                    |
| SQDG 34:2 | 0.6                | 1.1                  | 0.2                    |
| PG 34:2   | 0.6                | 1.0                  | 0.1                    |
| MGMG 16:1 | 0.9                | 1.0                  | 0.1                    |

|           |       |     |      |
|-----------|-------|-----|------|
| MGDG 36:3 | 1.0   | 1.0 | 0.0  |
| DGDG 36:3 | 0.8   | 1.0 | 0.0  |
| DGDG 34:2 | 0.8   | 0.9 | -0.1 |
| SQDG 32:1 | 0.8   | 0.9 | -0.1 |
| SQDG 34:3 | 0.6   | 0.9 | -0.1 |
| DGDG 34:3 | 0.4   | 0.9 | -0.2 |
| MGDG 34:4 | 0.3   | 0.8 | -0.3 |
| PG 34:3   | 0.2   | 0.7 | -0.4 |
| MGDG 36:4 | 0.1   | 0.7 | -0.4 |
| MGDG 32:2 | 0.2   | 0.7 | -0.5 |
| SQDG 34:0 | 0.2   | 0.7 | -0.6 |
| DGDG 32:1 | 0.04  | 0.6 | -0.7 |
| DGDG 34:4 | 0.2   | 0.7 | -0.8 |
| DGDG 33:3 | 0.01  | 0.5 | -0.9 |
| MGDG 33:3 | 0.004 | 0.5 | -0.9 |
| MGDG 33:1 | 0.006 | 0.4 | -1.1 |
| DGDG 32:2 | 0.004 | 0.4 | -1.2 |
| SQDG 33:0 | 0.004 | 0.4 | -1.3 |
| DGDG 33:2 | 0.004 | 0.4 | -1.4 |
| MGDG 33:2 | 0.004 | 0.3 | -1.6 |
| SQDG 33:1 | 0.004 | 0.3 | -1.9 |

**Table S5.** The comparison of lipid composition between *Synechocystis* sp. PCC 60803 *tolC*-mutant and wild-type (WT) strains in FGM and SGM (Mann-Whitney unpaired analysis,  $p < 0.05$ ). Fold-changes were calculated by dividing the average peak area of a given lipid species detected in samples of TolC-mutant strain ( $n=6$ ) by the average peak area of the same lipid species detected in samples of WT strain ( $n=6$ ) (Mann-Whitney unpaired analysis,  $p < 0.05$ ).

| Compound | p TolC FGM vs WT | p TolC SGM vs WT | FC TolC vs WT | FC TolC vs WT |
|----------|------------------|------------------|---------------|---------------|
|          | FGM              | SGM              | FGM           | SGM           |
| DGDG36:3 | 0.004            | 0.02             | 6.7           | 2.4           |
| MGDG36:3 | 0.004            | 0.5              | 6.6           | 1.2           |
| MGDG36:4 | 0.004            | 0.06             | 4.0           | 1.8           |
| DGDG34:1 | 0.02             | 0.004            | 2.8           | 3.1           |
| SQDG34:3 | 0.01             | 0.1              | 2.8           | 1.6           |
| DGDG32:0 | 0.01             | 0.007            | 2.8           | 2.6           |
| MGDG30:1 | 0.02             | 0.004            | 2.0           | 2.1           |
| MGMG18:3 | 0.06             | 0.01             | 1.9           | 1.5           |
| MGMG18:2 | 0.04             | 0.004            | 1.9           | 1.8           |
| MGMG16:1 | 0.06             | 0.004            | 1.7           | 1.9           |



---

|          |      |       |      |      |
|----------|------|-------|------|------|
| SQDG32:1 | 0.08 | 0.04  | 1.7  | 2.0  |
| DGDG34:2 | 0.2  | 0.02  | 1.7  | 2.4  |
| MGDG34:4 | 0.1  | 0.03  | 1.6  | 2.6  |
| PG34:1   | 0.3  | 0.4   | 1.5  | 1.6  |
| DGDG32:1 | 0.1  | 0.01  | 1.4  | 2.1  |
| SQDG34:1 | 0.2  | 0.04  | 1.4  | 2.0  |
| MGDG32:1 | 0.3  | 0.06  | 1.4  | 2.2  |
| SQDG33:1 | 0.1  | 0.08  | 1.4  | 1.7  |
| MGDG34:1 | 0.3  | 0.2   | 1.3  | 1.5  |
| MGDG32:2 | 0.2  | 0.007 | 1.3  | 1.9  |
| SQDG34:2 | 0.3  | 0.2   | 1.2  | 1.6  |
| MGDG34:2 | 0.6  | 0.06  | 1.2  | 1.7  |
| MGDG33:1 | 0.2  | 0.03  | 1.2  | 2.0  |
| MGDG32:3 | 0.5  | 0.3   | 1.2  | 0.5  |
| MGDG34:3 | 0.5  | 0.1   | 1.2  | 1.4  |
| DGDG32:2 | 0.5  | 0.02  | 1.1  | 1.8  |
| MGDG33:2 | 0.6  | 0.3   | 1.1  | 1.3  |
| MGMG16:0 | 0.6  | 0.9   | 1.1  | 1.3  |
| DGDG33:2 | 0.8  | 0.3   | 1.1  | 1.3  |
| SQDG34:0 | 0.8  | 0.3   | 1.0  | 2.0  |
| SQDG32:0 | 0.8  | 1.0   | 1.0  | 1.0  |
| PG34:2   | 1.0  | 0.3   | 1.0  | 1.6  |
| MGDG33:3 | 1.0  | 0.8   | 1.0  | 1.0  |
| DGDG34:3 | 1.0  | 0.1   | 0.94 | 1.6  |
| MGDG32:0 | 1.0  | 0.1   | 0.94 | 0.78 |
| DGDG34:4 | 0.9  | 0.02  | 0.9  | 2.3  |
| SQDG33:0 | 1.0  | 0.8   | 0.88 | 1.3  |
| PG34:3   | 0.6  | 0.3   | 0.84 | 1.4  |
| DGDG33:3 | 0.3  | 0.5   | 0.81 | 1.2  |

---

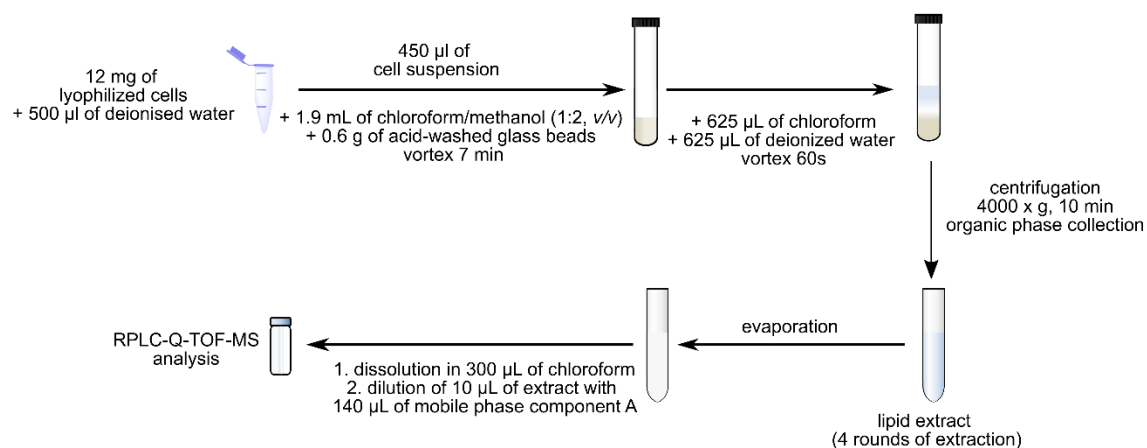

**Figure S1.** Analytical workflow used for the lipidomic analysis of *Synechocystis* sp. PCC 6803 cells.

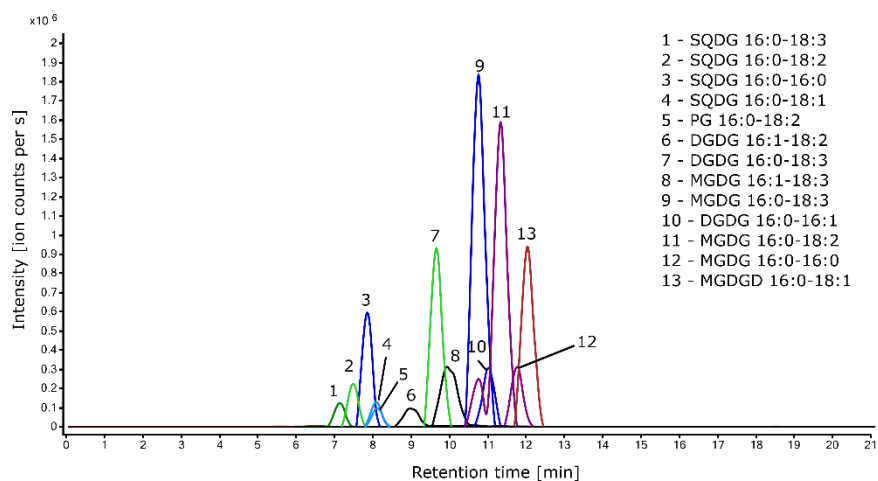

**Figure S2.** Representative ion chromatogram of the most abundant lipid species of *Synechocystis* sp. PCC 6803 wild-type.

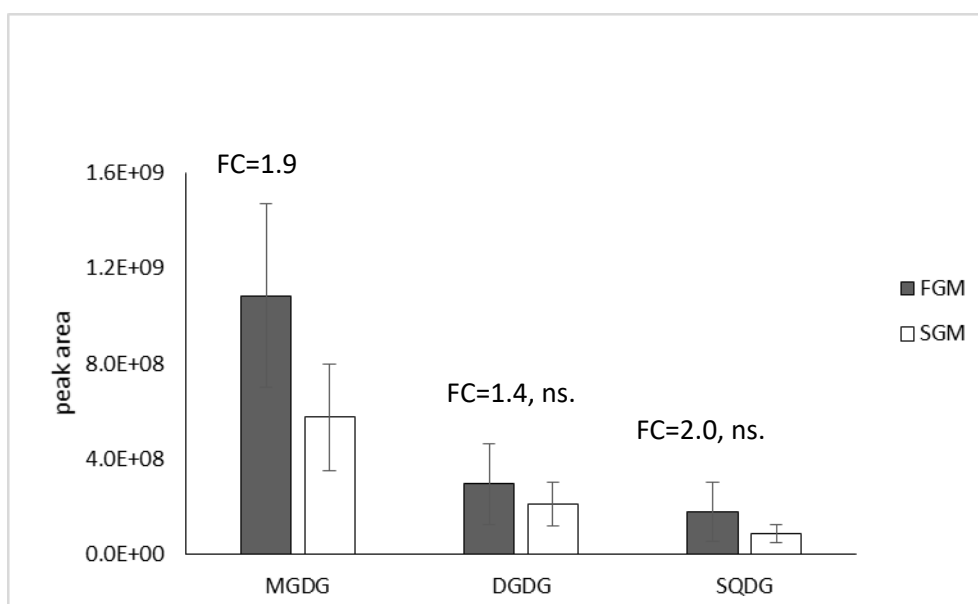

**Figure S3.** The total content of lipids among MGDG, DGDG and SQDG classes of the *Synechocystis* sp. PCC 6803 wild-type strain cultivated in slow- (SGM, white bars) or fast-growth mode (FGM, gray bars). Error bars indicate standard deviation corresponding to 6 independent biological replicates. FC – fold change. \*  $P < 0.05\%$ ; n.s.: not significant. (Mann-Whitney unpaired analysis,  $p < 0.05$ )

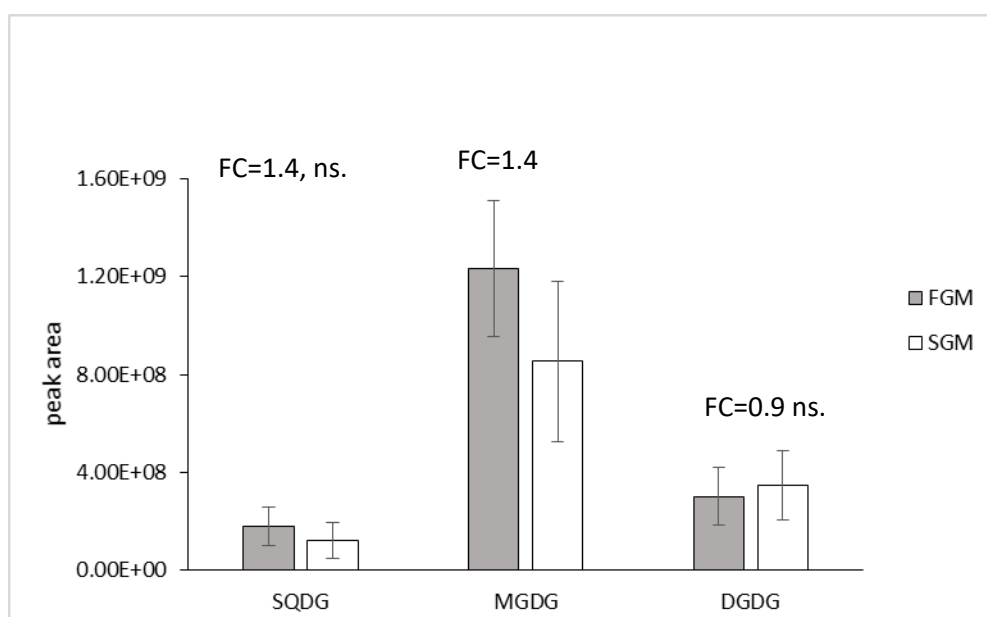

**Figure S4.** The total content of lipids among MGDG, DGDG and SQDG classes of the *Synechocystis* sp. PCC 6803 *tolC*-mutant strain cultivated in slow- (SGM, white bars) or fast-growth mode (FGM, gray bars). Error bars indicate standard deviation corresponding to 6 independent biological replicates. FC – fold change. ns.: not significant. (Mann-Whitney unpaired analysis,  $p < 0.05$ ).
